# Supplementary material for: High‐Sensitivity Cardiac Troponin T and Cognitive Function Over 12 Months After Stroke—Results of the DEMDAS Study
Source: PubMed Central journal article supplement — J Am Heart Assoc. 2024 Mar 8;13(6):e033439. doi: 10.1161/JAHA.123.033439 (PMC11010029; doi:10.1161/jaha.123.033439), 2024-03-08
Supplement: JAH3-13-e033439-s001.pdf [file JAH3-13-e033439-s001.pdf]

# **SUPPLEMENTAL MATERIAL**

## **Data S1.**

### **Supplemental Methods**

#### *Neuroimaging*

The MRI protocol included 3D T1-weighted (T1w) magnetization prepared rapid gradient echo (MPRAGE), 3D fluid-attenuated inversion recovery (FLAIR), diffusion-weighted imaging (DWI) with multiple diffusion directions, T2-weighted (T2w) turbo spin echo, and T2\*-weighted (T2\*w) fast low angle shot (FLASH) gradient echo [12]. The following markers of cerebral SVD were assessed: lacune count, periventricular and deep white matter hyperintensities (WMH), cerebral microbleed (CMB) count and perivascular spaces (PVS). Lacune count was examined on FLAIR and T1-weighted images. Lacunes were defined as a round or ovoid, subcortical lesions with a signal similar to CSF and an axial diameter between 3 mm and 15 mm [42]. We evaluated severity of periventricular and deep white matter hyperintensities (WMH) on FLAIR images using the Fazekas scale [44]. Cerebral microbleed (CMB) count was examined on T2\*-weighted images. CMB were defined as small (2-10 mm), round areas of signal void [42]. Perivascular spaces (PVS) were defined as fluid-filled, linear or round/ovoid spaces with a signal similar to CSF (i.e. hyperintense on T2-weighted and hypointense on T1-weighted images) and a diameter <3 mm that follow the typical course of penetrating vessels in the basal ganglia and centrum semiovale [42]. PVS were graded from 0 to 4 according to MacLulich et al [45]. All images were analyzed by experienced raters in a centralized core laboratory and blinded to clinical information. SVD markers were evaluated for both hemispheres collectively.

**Table S1. Neuropsychological tests included in each cognitive domain**

| <b>Domain</b>         | <b>Included tests</b>                                                                                                                                          |
|-----------------------|----------------------------------------------------------------------------------------------------------------------------------------------------------------|
| Language              | word fluency test (animal, s-words), CERAD-Boston naming test (15 items), MMSE-language items                                                                  |
| Memory                | CERAD-word list learning, CERAD-word list recall, CERAD-word list recognition, CERAD-figure recall, Rey-Osterrieth complex figure-immediate and delayed recall |
| Executive function    | trail making test B, Stroop test                                                                                                                               |
| Attention             | trail making test A, number symbol test                                                                                                                        |
| Visuospatial function | CERAD-figure drawing test, Rey-Osterrieth complex figure-copy test                                                                                             |

**Neuropsychological testing was performed six and twelve months after the index stroke. Abbreviations: CERAD =**

**Consortium to Establish a Registry for Alzheimer's Disease, MMSE = mini-mental status examination**

**Table S2. Baseline characteristics of patients included in and of SVD excluded from analyses markers**

|                                              | Patients included<br>in analyses of SVD<br>markers (n=466) | Patients excluded<br>from analyses of<br>SVD markers<br>(n=134) | p     |
|----------------------------------------------|------------------------------------------------------------|-----------------------------------------------------------------|-------|
| Age, years, median (IQR)                     | 68 (60-76)                                                 | 70 (57-76)                                                      | 0.551 |
| Female sex, n (%)                            | 156 (33.5%)                                                | 44 (32.8%)                                                      | 0.890 |
| Years of education, median<br>(IQR)          | 13 (12-16)                                                 | 13 (12-16)                                                      | 0.766 |
| History of hypertension, n (%)               | 259 (55.6%)                                                | 77 (57.5%)                                                      | 0.639 |
| History of diabetes, n (%)                   | 67 (14.4%)                                                 | 26 (19.4%)                                                      | 0.146 |
| History of coronary artery<br>disease, n (%) | 26 (5.6%)                                                  | 9 (6.7%)                                                        | 0.611 |
| History of atrial fibrillation, n<br>(%)     | 46 (9.9%)                                                  | 20 (14.9%)                                                      | 0.106 |
| Cognitive impairment at<br>baseline, n (%)   | 232 (49.8%)                                                | 72 (53.7%)                                                      | 0.398 |
| Hs-cTnT, median (IQR)                        | 7 (4-13)                                                   |                                                                 |       |
| Hs-cTnT > URL, n (%)                         | 100 (21.5%)                                                |                                                                 |       |
| Stroke etiology                              |                                                            |                                                                 |       |
| Large artery atherosclerosis, n<br>(%)       | 131 (28.1%)                                                | 32 (23.9%)                                                      | 0.830 |
| Cardioembolism, n (%)                        | 98 (21.0%)                                                 | 35 (26.1%)                                                      | 0.054 |
| Small artery occlusion, n (%)                | 57 (12.2%)                                                 | 9 (6.7%)                                                        | 0.158 |

|                                             |             |            |       |
|---------------------------------------------|-------------|------------|-------|
| Other etiology, n (%)                       | 52 (11.2%)  | 13 (9.7%)  | 0.965 |
| Undetermined etiology, n (%)                | 128 (27.5%) | 29 (21.6%) | 0.527 |
| IQCODE score, median (IQR)                  | 48 (48-50)  | 48 (48-50) | 0.942 |
| Baseline NIHSS score, median (IQR)          | 2 (1-5)     | 3 (1-5)    | 0.431 |
| SVD total score, n (%)                      |             |            |       |
| 0                                           | 187 (40.1%) |            |       |
| 1                                           | 137 (29.4%) |            |       |
| 2                                           | 94 (20.2%)  |            |       |
| 3                                           | 36 (7.7%)   |            |       |
| 4                                           | 12 (2.6%)   |            |       |
| Lacune count, median (IQR)                  | 0 (0-0)     |            |       |
| SVD score lacunes, n (%)                    | 58 (12.4%)  |            |       |
| CMB count, median (IQR)                     | 0 (0-0)     |            |       |
| SVD score CMB, n (%)                        | 48 (10.3%)  |            |       |
| PVS grade, n (%)                            |             |            |       |
| 1                                           | 321 (68.9%) |            |       |
| 2                                           | 76 (16.3%)  |            |       |
| 3                                           | 64 (13.7%)  |            |       |
| 4                                           | 5 (1.1%)    |            |       |
| SVD score PVS, n (%)                        | 145 (31.1%) |            |       |
| Fazekas periventricular white matter, n (%) |             |            |       |
| 0                                           | 93 (20.0%)  |            |       |
| 1                                           | 249 (53.4%) |            |       |
| 2                                           | 81 (17.4%)  |            |       |

|                                  |             |             |            |       |
|----------------------------------|-------------|-------------|------------|-------|
|                                  | 3           | 43 (9.2%)   |            |       |
| Fazekas deep white matter, n (%) |             |             |            |       |
|                                  | 0           | 63 (13.5%)  |            |       |
|                                  | 1           | 174 (37.3%) |            |       |
|                                  | 2           | 201 (43.1%) |            |       |
|                                  | 3           | 28 (6.0%)   |            |       |
| SVD score WMH, n (%)             |             | 230 (49.4%) |            |       |
| Stroke localization              |             |             |            |       |
| Anterior left                    | 133 (28.5%) |             | 28 (20.9%) | 0.078 |
| Anterior right                   | 117 (25.1%) |             | 29 (21.6%) | 0.410 |
| Posterior cerebral artery left   | 36 (7.7%)   |             | 6 (4.5%)   | 0.194 |
| Posterior cerebral artery right  | 34 (7.3%)   |             | 5 (3.7%)   | 0.140 |
| Brainstem                        | 46 (9.9%)   |             | 8 (6.0%)   | 0.164 |
| Cerebellum                       | 35 (7.5%)   |             | 8 (6.0%)   | 0.542 |
| Multiple                         | 64 (13.7%)  |             | 14 (10.4%) | 0.319 |

There were no statistically significant differences in baseline characteristics between patients that were included in the analyses of hs-cTnT and SVD markers and those that were excluded from these analyses due to missing data.

Abbreviations: SVD = small vessel disease, IQR = interquartile range, hs-cTnT = high-sensitivity cardiac troponin T, IQCODE = Informant Questionnaire on Cognitive Decline in the Elderly, NIHSS = National Institutes of Health Stroke Scale, CMB = cerebral microbleeds, PVS = perivascular spaces, WMH = white matter hyperintensities

**Table S3. Association between hs-cTnT and cognitive adjustment domains after additional for total SVD score**

|                     | Language score                    | Memory score                   | Executive score                           | Attention score                           | Visual-spatial score           | Global cognitive score         |
|---------------------|-----------------------------------|--------------------------------|-------------------------------------------|-------------------------------------------|--------------------------------|--------------------------------|
| <b>Longitudinal</b> | -0.01 (-0.18-0.16),<br>p=0.884    | -0.04 (-0.18-0.09),<br>p=0.513 | -0.19 (-0.42-0.06),<br>p=0.130            | <b>-0.26 (-0.43 - -0.09),<br/>p=0.003</b> | -0.06 (-0.29-0.18),<br>p=0.625 | -0.07 (-0.20-0.06),<br>p=0.303 |
| <b>At 6 months</b>  | -0.06 (-0.25 - -0.13),<br>p=0.527 | -0.06 (-0.24-0.11),<br>p=0.486 | -0.05 (-0.31-0.22),<br>p=0.725            | <b>-0.23 (-0.44 - -0.02),<br/>p=0.030</b> | -0.05 (-0.33-0.23),<br>p=0.719 | -0.02 (-0.17-0.13),<br>p=0.783 |
| <b>At 12 months</b> | 0.04 (-0.15-0.23),<br>p=0.672     | -0.02 (-0.20-0.16),<br>p=0.798 | <b>-0.33 (-0.62 - -0.04),<br/>p=0.027</b> | <b>-0.29 (-0.51 - -0.08),<br/>p=0.009</b> | -0.07 (-0.40-0.27),<br>p=0.703 | -0.12 (-0.28-0.04),<br>p=0.149 |

Log-transformed Hs-cTnT and cognitive domains (continuous) across 12 months of follow-up according to generalized linear regression models using GEE. Log-transformed Hs-cTnT and cognitive domains (continuous) at 6 and 12 months of follow-up according to linear regression models. The table displays the respective regression coefficients and 95% confidence intervals. Adjustment was made for age, sex, years of education, hypertension, diabetes, coronary artery disease, atrial fibrillation, cognitive impairment at baseline, baseline NIHSS, pre-stroke mRS and total SVD score. The results remained unchanged compared to the main analyses: after additional adjustment for the total SVD score, hs-cTnT remained negatively associated with performance in the domain 'attention' in the longitudinal and cross-sectional analyses. Hs-cTnT remained negatively associated with performance in the domain 'executive function' after twelve months of follow-up.

**Table S4. Association between hs-cTnT and cognitive adjustment domains after additional for stroke localization (left anterior territory)**

|                     | Language score                 | Memory score                   | Executive score                           | Attention score                           | Visual-spatial score           | Global cognitive score         |
|---------------------|--------------------------------|--------------------------------|-------------------------------------------|-------------------------------------------|--------------------------------|--------------------------------|
| <b>Longitudinal</b> | -0.01 (-0.17-0.15),<br>p=0.922 | -0.03 (-0.15-0.10),<br>p=0.670 | -0.20 (-0.43-0.02),<br>p=0.077            | <b>-0.26 (-0.43 - -0.10),<br/>p=0.002</b> | -0.08 (-0.30-0.14),<br>p=0.473 | -0.08 (-0.20-0.05),<br>p=0.218 |
| <b>At 6 months</b>  | -0.05 (-0.23-0.13),<br>p=0.564 | -0.03 (-0.20-0.14),<br>p=0.735 | -0.07 (-0.32-0.19),<br>p=0.610            | <b>-0.24 (-0.44 - -0.04),<br/>p=0.019</b> | -0.08 (-0.36-0.19),<br>p=0.546 | -0.03 (-0.18-0.11),<br>p=0.675 |
| <b>At 12 months</b> | 0.04 (-0.14-0.22),<br>p=0.654  | -0.02 (-0.20-0.15),<br>p=0.739 | <b>-0.35 (-0.62 - -0.07),<br/>p=0.015</b> | <b>-0.29 (-0.49 - -0.08),<br/>p=0.006</b> | -0.08 (-0.41-0.25),<br>p=0.646 | -0.13 (-0.28-0.03),<br>p=0.109 |

Log-transformed Hs-cTnT and cognitive domains (continuous) across 12 months of follow-up according to generalized linear regression models using GEE. Log-transformed Hs-cTnT and cognitive domains (continuous) at 6 and 12 months of follow-up according to linear regression models. The table displays the respective regression coefficients and 95% confidence intervals. Adjustment was made for age, sex, years of education, hypertension, diabetes, coronary artery disease, atrial fibrillation, cognitive impairment at baseline, baseline NIHSS, pre-stroke mRS and localization in the left anterior territory. The results remained unchanged compared to the main analyses: after additional adjustment for stroke localization in the left anterior territory, hs-cTnT remained negatively associated with performance in the domain 'attention' in the longitudinal and cross-sectional analyses. Hs-cTnT remained negatively associated with performance in the domain 'executive function' after twelve months of follow-up.



**Table S5. Association between hs-cTnT and cognitive patients with domains after exclusion of stroke in multiple territories**

|                     | Language score                    | Memory score                     | Executive score                                    | Attention score                                    | Visual-spatial score              | Global cognitive score            |
|---------------------|-----------------------------------|----------------------------------|----------------------------------------------------|----------------------------------------------------|-----------------------------------|-----------------------------------|
| <b>Longitudinal</b> | -0.022 (-0.198-0.154),<br>p=0.806 | 0.012 (-0.129-0.153),<br>p=0.868 | -0.249 (-0.512-0.015),<br>p=0.064                  | <b>-0.235 (-0.431 - -0.040),</b><br><b>p=0.018</b> | -0.053 (-0.319-0.214),<br>p=0.699 | -0.057 (-0.200-0.086),<br>p=0.434 |
| <b>At 6 months</b>  | -0.084 (-0.287-0.119),<br>p=0.417 | 0.004 (-0.186-0.194),<br>p=0.967 | -0.125 (-0.412-0.163),<br>p=0.394                  | -0.224 (-0.453-0.004),<br>p=0.054                  | -0.088 (-0.405-0.229),<br>p=0.585 | -0.026 (-0.190-0.137),<br>p=0.752 |
| <b>At 12 months</b> | 0.048 (-0.161-0.257),<br>p=0.652  | 0.024 (-0.175-0.222),<br>p=0.815 | <b>-0.379 (-0.678 - -0.080),</b><br><b>p=0.013</b> | <b>-0.245 (-0.477 - -0.013),</b><br><b>p=0.039</b> | -0.015 (-0.401-0.372),<br>p=0.941 | -0.088 (-0.256-0.079),<br>p=0.301 |

Log-transformed Hs-cTnT and cognitive domains (continuous) across 12 months of follow-up according to generalized linear regression models using GEE. Log-transformed Hs-cTnT and cognitive domains (continuous) at 6 and 12 months of follow-up according to linear regression models. The table displays the respective regression coefficients and 95% confidence intervals. Adjustment was made for age, sex, years of education, hypertension, diabetes, coronary artery disease, atrial fibrillation, cognitive impairment at baseline, baseline NIHSS and pre-stroke mRS. After exclusion of patients with strokes in multiple territories, the association between hs-cTnT and performance in the domain 'attention' at six months of follow-up was no longer significant. Apart from that, the results remained unchanged compared to the main analyses.

**Table S6. Association between hs-cTnT and markers patients with of SVD after exclusion of stroke in multiple territories**

|                | <b>Global SVD score</b>                 | <b>SVD score lacune</b>         | <b>SVD score CMB</b>            | <b>SVD score PVS</b>            | <b>SVD score WMH</b>                    |
|----------------|-----------------------------------------|---------------------------------|---------------------------------|---------------------------------|-----------------------------------------|
| <b>Hs-cTnT</b> | <b>1.741 (1.060-2.860),<br/>p=0.029</b> | 2.149 (0.993-4.652),<br>p=0.052 | 1.695 (0.733-3.921),<br>p=0.218 | 0.947 (0.502-1.787),<br>p=0.867 | <b>2.109 (1.108-4.013),<br/>p=0.023</b> |
|                | <b>Lacune count</b>                     | <b>CMB count</b>                | <b>PVS grade</b>                | <b>Fazekas PVWM</b>             | <b>Fazekas DWM</b>                      |
| <b>Hs-cTnT</b> | <b>2.292 (1.226-4.386),<br/>p=0.009</b> | 1.561 (0.871-2.798),<br>p=0.135 | 1.016 (0.560-1.844),<br>p=0.959 | 1.494 (0.903-2.472),<br>p=0.118 | <b>1.750 (1.042-2.940),<br/>p=0.035</b> |

Log-transformed hs-cTnT and global cerebral small vessel disease (SVD) score, the four constituent SVD subscores and individual SVD markers in their entire range. Odds ratios and 95% confidence intervals were derived from ordinal logistic regression models for the global SVD score and binary logistic regression models for each constituent subscore, respectively. Odds ratios were derived from ordinal regression models for periventricular white matter hyperintensities (PVWMH) grade, deep WMH (DWM) grade and perivascular spaces (PVS) grade and from negative binomial regression models for lacune count and cerebral microbleed (CMB) count. Adjustment was made for age, sex, hypertension, diabetes, hyperlipidemia, coronary artery disease, atrial fibrillation, smoking status and baseline NIHSS. Abbreviations: SVD = small vessel disease, CMB = cerebral microbleeds, WMH = white matter hyperintensities, PVS = perivascular spaces. After exclusion of patients with strokes in multiple territories, the association between hs-cTnT and the lacune sub-score was no longer statistically significant. Apart from that, the results remained unchanged compared to the main analyses.

Figure S1. Flow chart for inclusion/exclusion of patients.

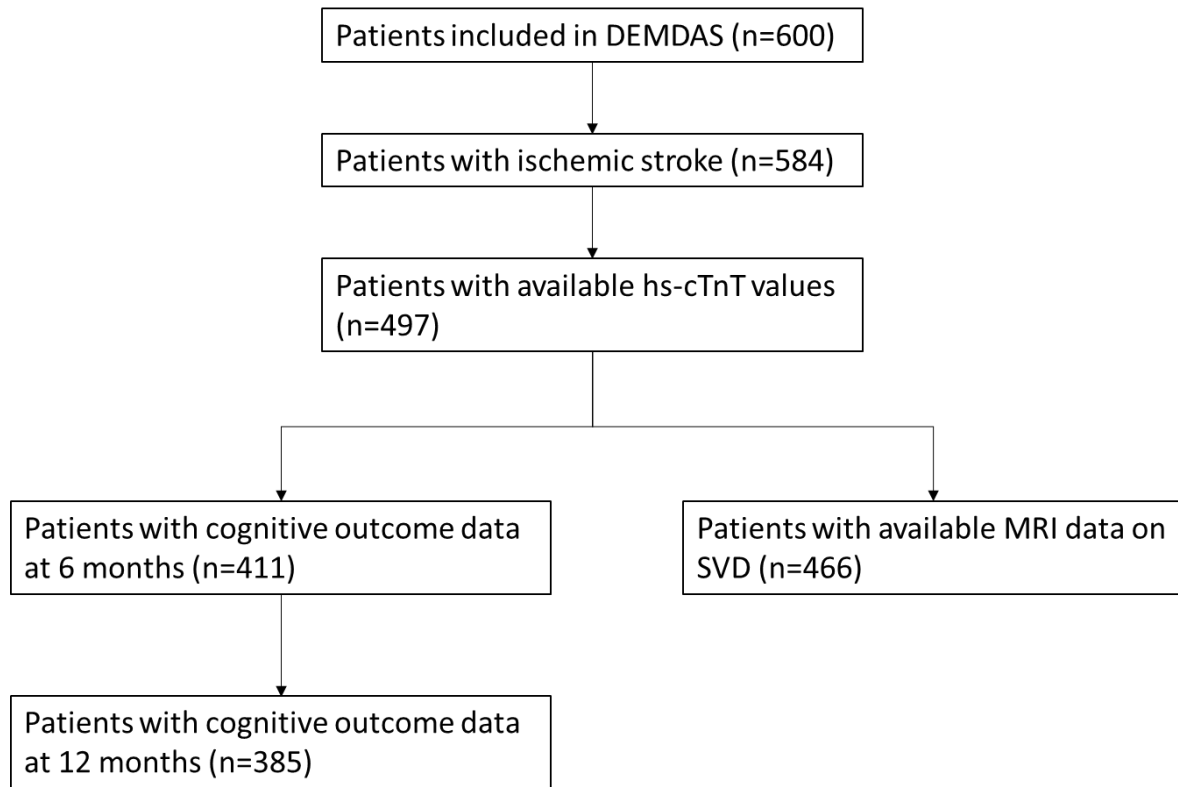

hs-cTnT = high-sensitivity cardiac troponin T. SVD = small vessel disease

Figure S2. Association between hs-cTnT and cognitive impairment across 12 months of follow-up after stroke, as derived from three logistic GEE models with different levels of adjustments.

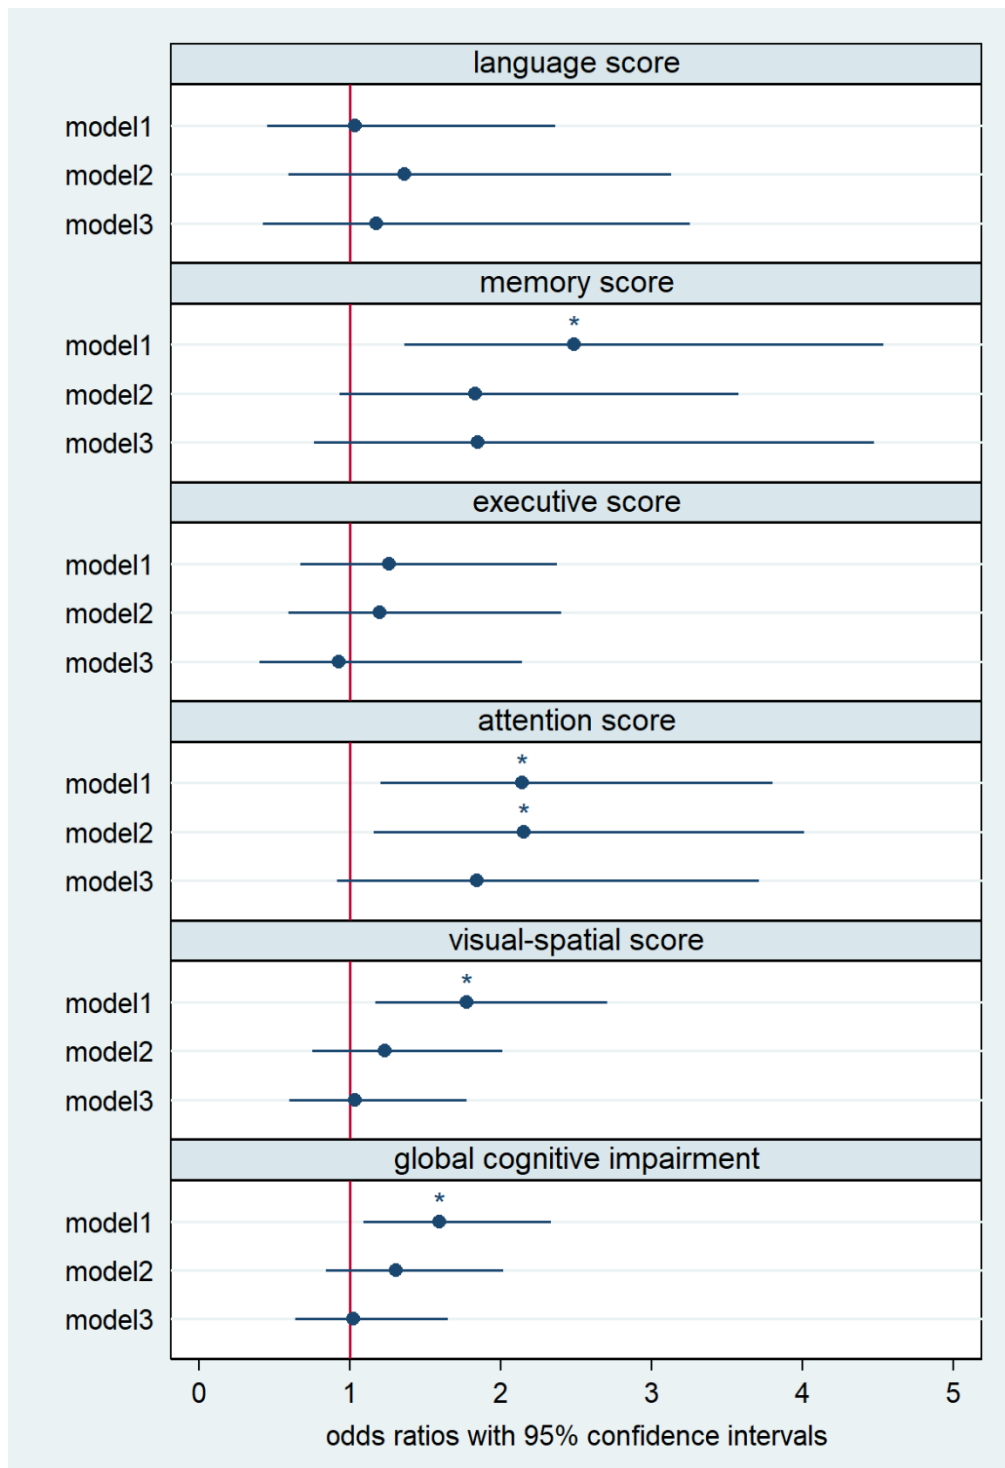

Model 1: unadjusted. Model 2: adjusted for age, sex and years of education. Model 3: additional adjustment for hypertension, diabetes, coronary artery disease, atrial fibrillation, cognitive impairment at baseline, baseline NIHSS and pre-stroke mRS. After full adjustment, there was no significant association between hs-cTnT and impairment in any cognitive domain in the longitudinal analyses. \* $P_{corr} < 0.05$

Figure S3. Association between hs-cTnT and cognitive impairment at 6 months of follow-up after stroke, as derived from three penalized logistic regression models with different levels of adjustments.

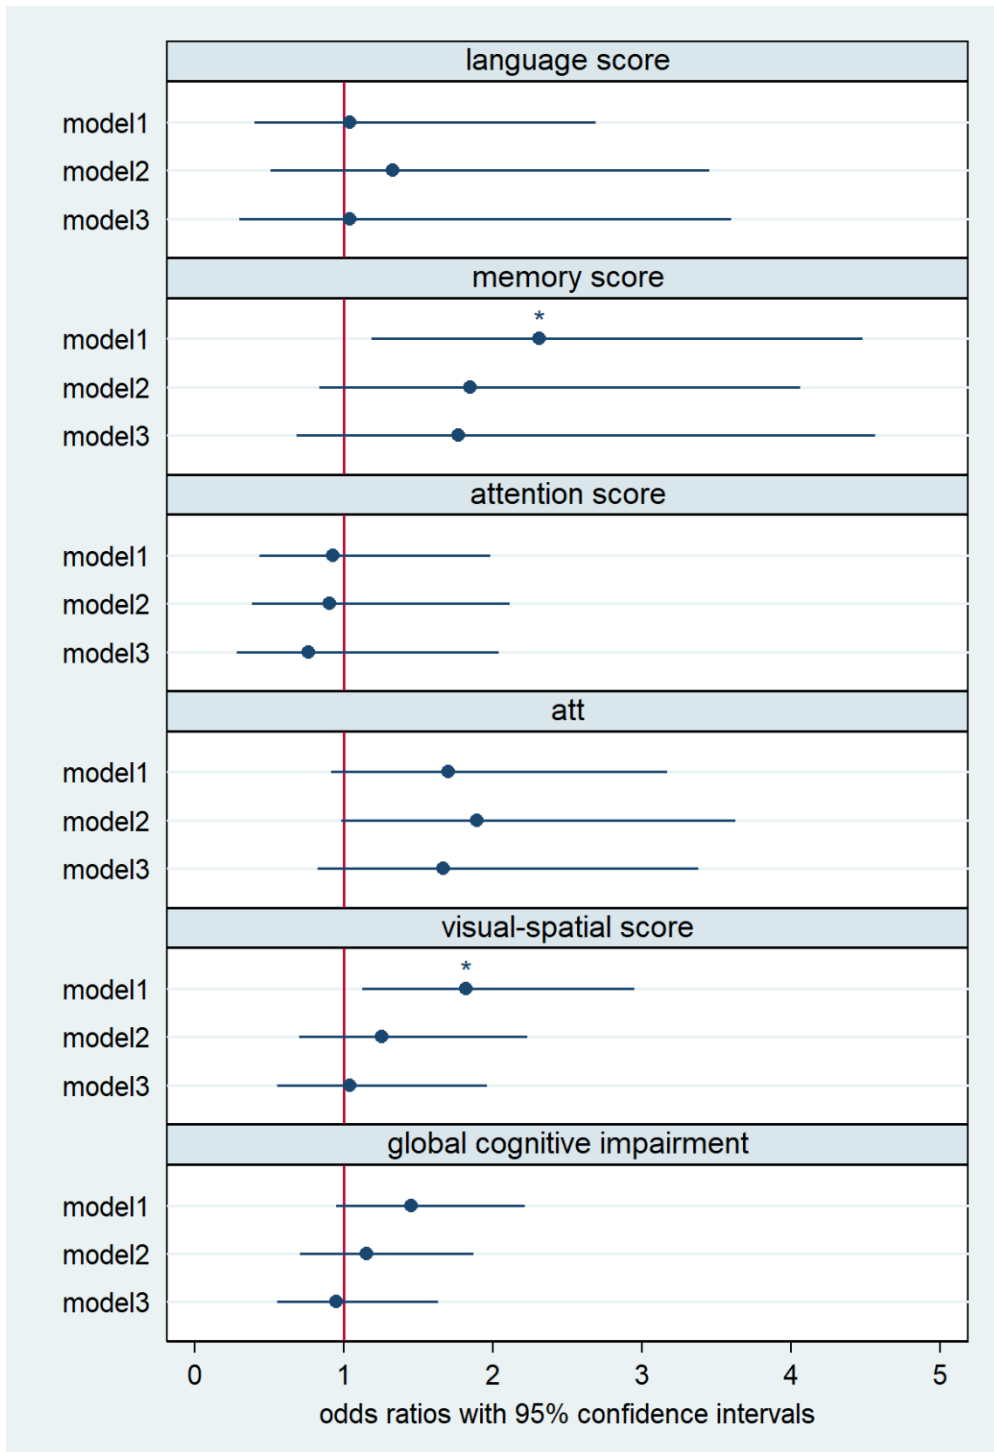

Model 1: unadjusted. Model 2: adjusted for age, sex and years of education. Model 3: additional adjustment for hypertension, diabetes, coronary artery disease, atrial fibrillation, cognitive impairment at baseline, baseline NIHSS and pre-stroke mRS. After full adjustment, there was no significant association between hs-cTnT and impairment in any cognitive domain at 6 months of follow-up. \* $P_{corr} < 0.05$

Figure S4. Association between hs-cTnT and cognitive impairment at 12 months of follow-up after stroke, as derived from three penalized logistic regression models with different levels of adjustments.

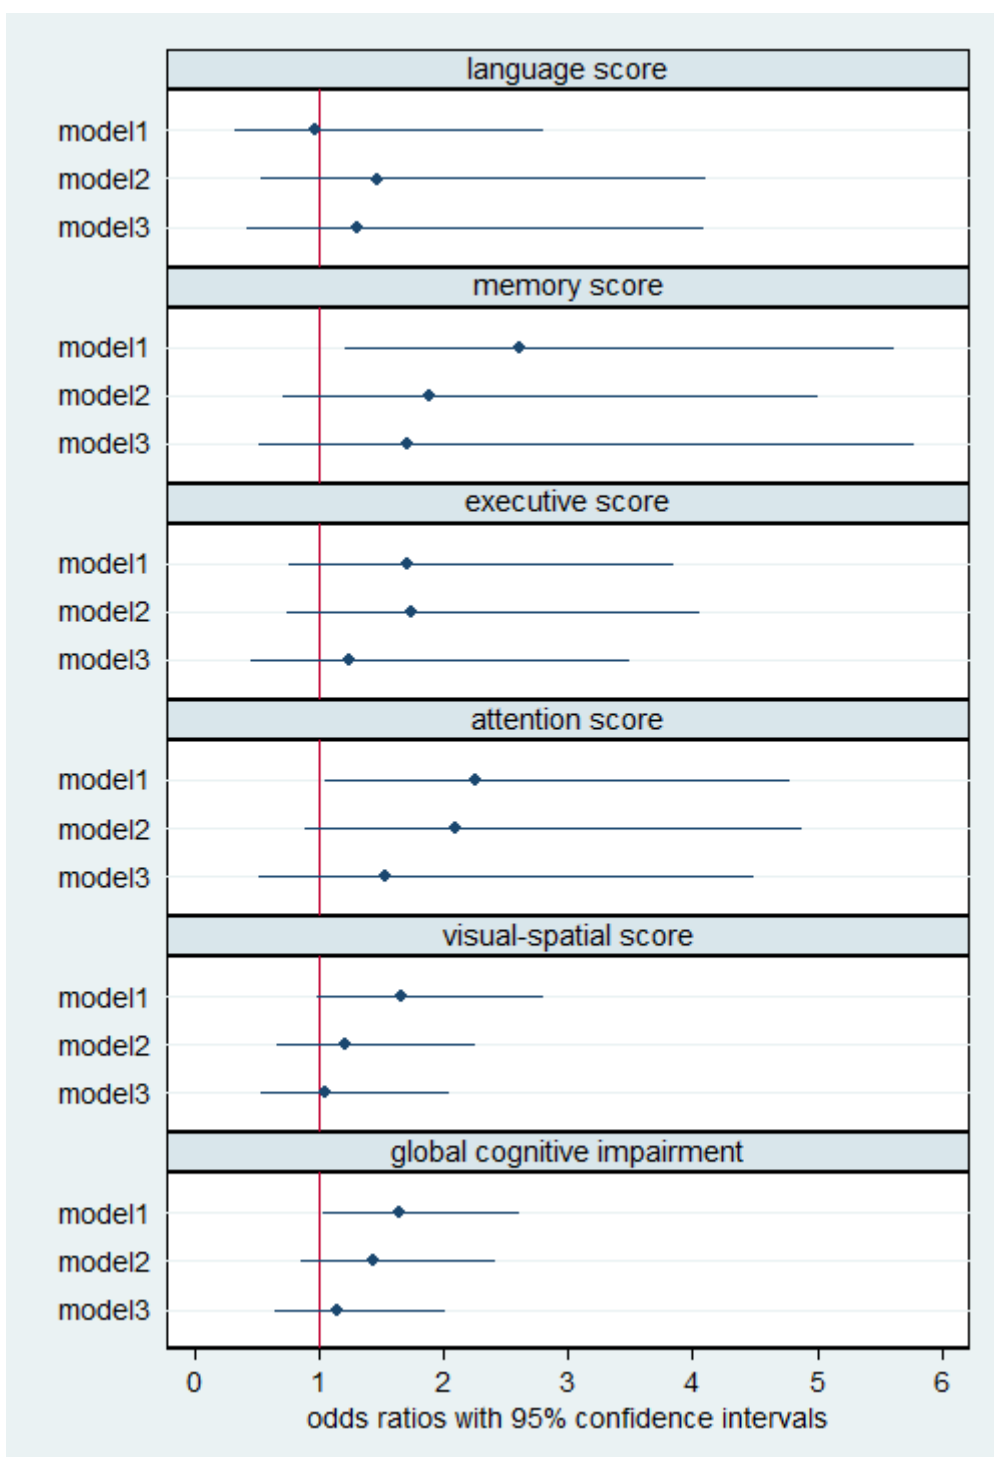

Model 1: unadjusted. Model 2: adjusted for age, sex and years of education. Model 3: additional adjustment for hypertension, diabetes, coronary artery disease, atrial fibrillation, cognitive impairment at baseline, baseline NIHSS and pre-stroke mRS. After full adjustment, there was no significant association between hs-cTnT and impairment in any cognitive domain at 12 months of follow-up. \* $P_{corr} < 0.05$
